# Supplementary material for: Efficient Sub-1 Minute Analysis of Selected Biomarker Catecholamines by Core-Shell Hydrophilic Interaction Liquid Chromatography (HILIC) with Nanomolar Detection at a Boron-Doped Diamond (BDD) Electrode
Source: MDPI journal article supplement (doi:10.3390/separations8080124), 2021-08-18
Supplement: s1 [file s1]

Archive with 1 entries (1 files):
- separations-1332266-supplementary.pdf
