# Supplementary material for: Efficient Sub-1 Minute Analysis of Selected Biomarker Catecholamines by Core-Shell Hydrophilic Interaction Liquid Chromatography (HILIC) with Nanomolar Detection at a Boron-Doped Diamond (BDD) Electrode
Source: MDPI journal article supplement (doi:10.3390/separations8080124), 2021-08-18
Supplement: s1 [file s1 › separations-1332266-supplementary.pdf]

# Efficient Sub-1 Minute Analysis of Selected Biomarker Catecholamines by CoreShell Hydrophilic Interaction Liquid Chromatography (HILIC) with Nanomolar Detection at a Boron-Doped Diamond (BDD) Electrode

Majidah Alsaedi, Huda Alghamdi, Phyllis E. Hayes, Anna M. Hogan and Jeremy D. Glennon \*

Innovative Chromatography Group, Irish Separation Science Cluster (ISSC) Ireland, School of Chemistry and the Analytical & Biological Chemistry Research Facility (ABCRF), University College Cork, Western Road, Cork T12 YN60, Ireland.

\* Correspondence: j.glennon@ucc.ie

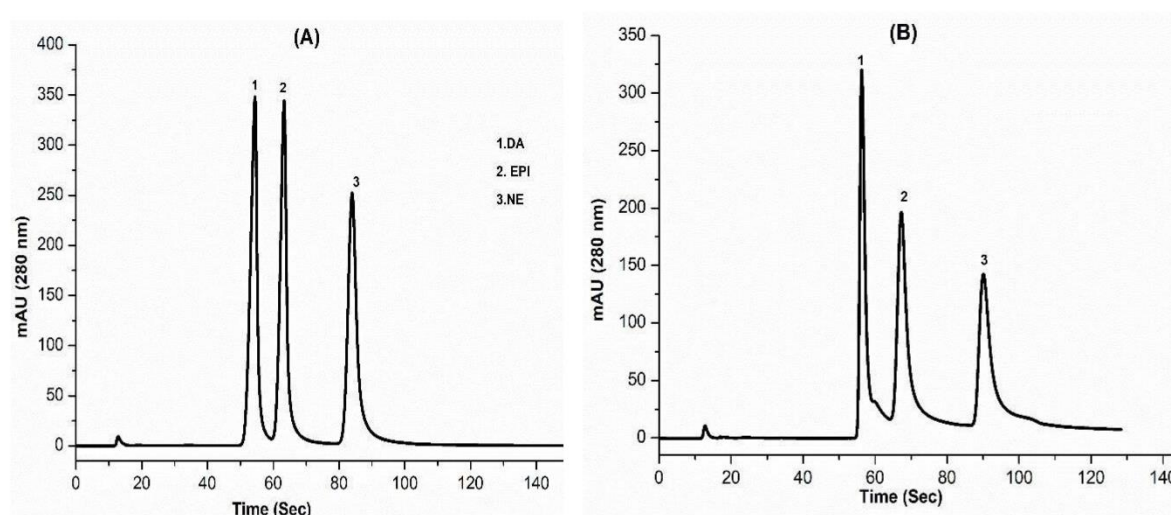

**Figure S1.** Effect of the mobile phase pH on the retention time of a mixture of 500 μM each of DA, EPI, and NE. Mobile phase: 15:85, ACN: 10 mM ammonium formate pH 3 (A) and 10 mM acetate pH 5 (B) Column: Poro-shell Z-HILIC (2.1 × 50 mm, 2.7 μm), flow rate: 0.5 mL/min, injection volume: 5 μL, UV detection: 280 nm, and Temperature 23 °C.

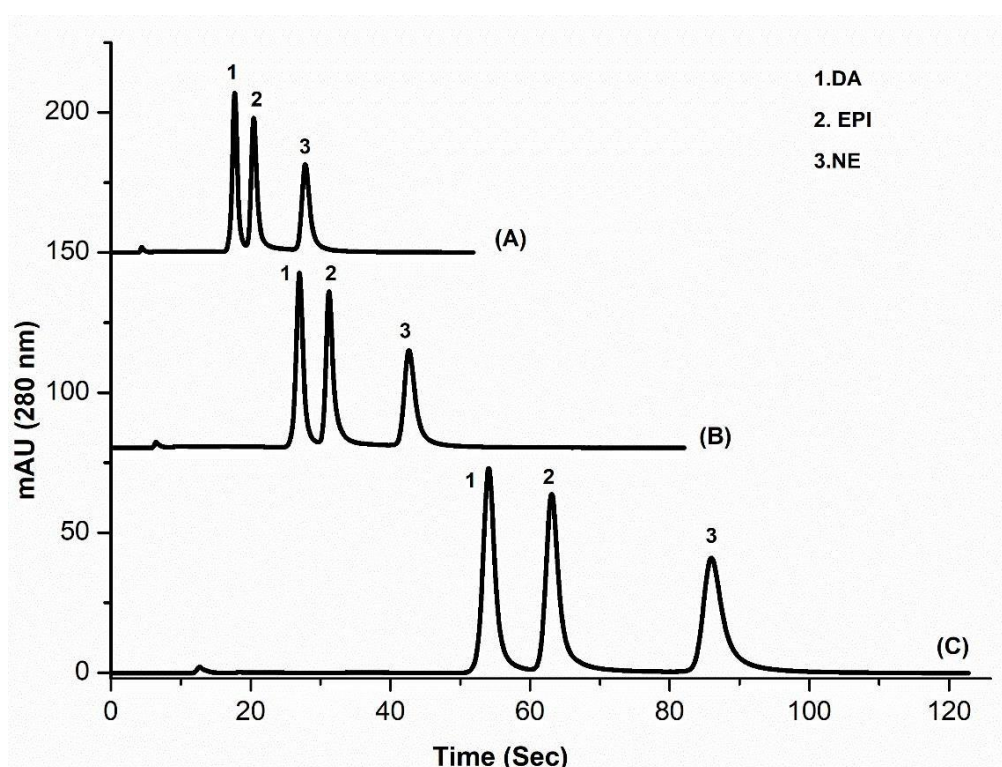

**Figure S2.** Effect of the mobile phase flow rate on the retention time of a mixture of 500 µM each of DA, EPI, and NE. Mobile phase: ACN: 10 mM ammonium formate pH 3 (85:15). Column: Poro-shell Z-HILIC (2.1 × 50 mm, 2.7 µm), injection volume: 1 µL, UV detection: 280 nm, Temperature 23 °C flow rate: 1.5 mL/min (A), 1 mL/min (B), 0.5 mL/min (C).

**Table S1.** Linear regression parameters of calibration curves, and precision data with HPLC-UV at 280 nm.

| Analyte | Linear Range (µM) | Linear Regression Equation | Correlation Coefficient ( $R^2$ ) | Intra-Day (%) <sup>a</sup> | Inter-Day (%) <sup>b</sup> |
|---------|-------------------|----------------------------|-----------------------------------|----------------------------|----------------------------|
| DA      | 50–500            | $y = 0.6248x - 1.6397$     | 0.999                             | 0.16                       | 0.41                       |
| EPI     | 50–500            | $y = 0.6349x - 0.088$      | 0.999                             | 0.14                       | 0.31                       |
| NE      | 50–500            | $y = 0.639x - 5.0173$      | 0.999                             | 0.28                       | 0.6                        |

<sup>a</sup> Intra-day (%) calculated from three measurements within one experiment for the retention time at 500 µM of each standard.

<sup>b</sup> Inter-day (%) calculated from three measurements within three different days for the retention time at 500 µM of each standard.
